# Supplementary material for: Intriguing transmission electron microscopy images observed for perpendicularly oriented cylindrical microdomains of block copolymers
Source: Royal Society of Chemistry journal article supplement (doi:10.1039/c4nr02074j), 2014-01-01
Supplement: c4nr02074j1.pdf [file c4nr02074j1.pdf]

### Supplementary Information

In Figures S1-S3, some examples of binarized images are shown for the aperture size of 97 pixels to examine effects of threshold. Figure S1 is obtained as black-and-white images from the gray-scale IFT images shown in Figure 4a by resetting pixel values to 0 (black) for the case of the original pixel value lower than the threshold value and resetting them to 255 (white) for the other case. Similarly, those shown in Figures S2 and S3 were converted from the gray-scale IFT images shown in Figures 4b and 4c (in the main text), which were respectively obtained by filtering another set of the representative 6 spots of the 1st-order peaks in the FT image as shown in the inset of Figure 2b (in the main text) with crosses and open circles, respectively. It is considered that the region of the hexagonal array becomes larger for the larger threshold value in the black-and-white images because the pixel having a value lower than the threshold value becomes dark. However, the difference among four images is trivial because the difference in the threshold value is unity. Furthermore, there is a region in Figures S2 and S3 where cylinders are merged with each other in one direction. Since such a region should be eliminated by the image analysis, this means that our method is not perfect.

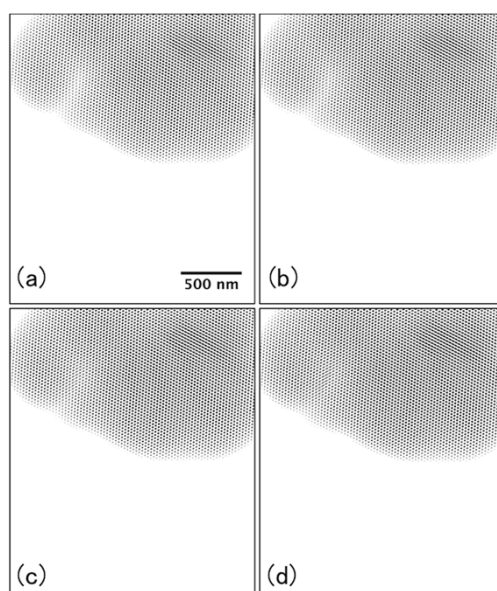

Figure S1 Demonstration of effects of threshold for binarization of the grayscale inverse FT images as shown in Figure 4a (in the main text). The values of the threshold are 1, 2, 3, and 4 for the parts (a), (b), (c), and (d), respectively.

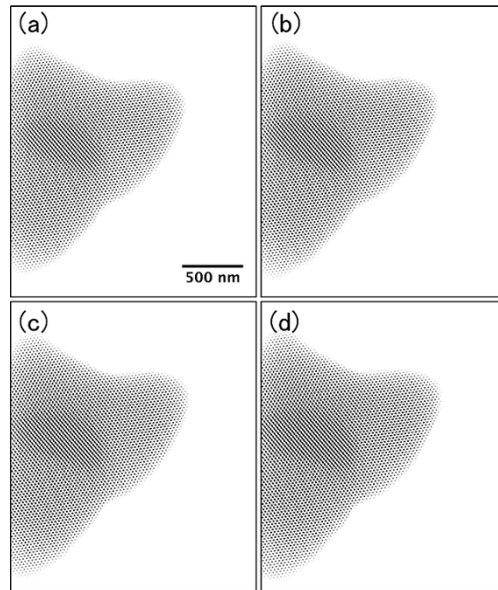

Figure S2 Demonstration of effects of threshold for binarization of the grayscale inverse FT image as shown in Figure 4b (in the main text). The values of the threshold are 1, 2, 3, and 4 for the parts (a), (b), (c), and (d), respectively.

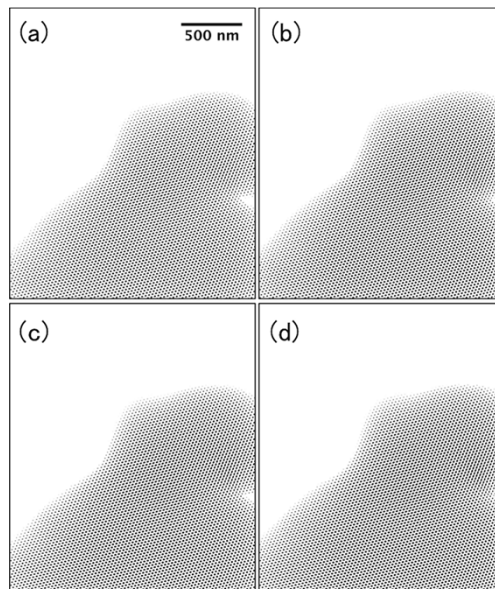

Figure S3 Demonstration of effects of threshold for binarization of the grayscale inverse FT image as shown in Figure 4c (in the main text). The values of the threshold are 1, 2, 3, and 4 for the parts (a), (b), (c), and (d), respectively.
